# Supplementary material for: Critical Role of ADAMTS-4 in the Development of Sporadic Aortic Aneurysm and Dissection in Mice
Source: PubMed Central journal article supplement (PMC5617887; doi:10.1038/s41598-017-12248-z), 2017-09-27
Supplement: 41598_2017_12248_MOESM1_ESM.pdf [file 41598_2017_12248_MOESM1_ESM.pdf]

## **Critical Role of ADAMTS-4 in the Development of Sporadic Aortic Aneurysm and Dissection in Mice**

Pingping Ren<sup>1†</sup>, Michael Hughes<sup>1†</sup>, Swapna Krishnamoorthy<sup>1</sup>, Sili Zou<sup>1,3</sup>, Lin Zhang<sup>1</sup>, Darrell Wu<sup>1,7</sup>, Chen Zhang<sup>1</sup>, John A. Curci<sup>4</sup>, Joseph S. Coselli<sup>1,2,6</sup>, Dianna M. Milewicz<sup>5</sup>, Scott A. LeMaire<sup>1,2,6,7\*</sup>, & Ying H. Shen<sup>1,2,6,\*</sup>

<sup>1</sup>Division of Cardiothoracic Surgery, Michael E. DeBakey Department of Surgery, Baylor College of Medicine, Houston, Texas, USA. <sup>2</sup>Department of Cardiovascular Surgery, Texas Heart Institute, Houston, Texas, USA. <sup>3</sup>Department of Vascular Surgery, Changzheng Hospital, Second Military Medical University, Shanghai, China. <sup>4</sup>Division of Vascular Surgery, Vanderbilt University School of Medicine, Nashville, Tennessee, USA. <sup>5</sup>Division of Medical Genetics, Department of Internal Medicine, The University of Texas Health Science Center at Houston, Houston, Texas, USA. <sup>6</sup>Cardiovascular Research Institute, Baylor College of Medicine, Houston, Texas, USA. <sup>7</sup>Department of Molecular Physiology and Biophysics, Baylor College of Medicine, Houston, Texas, USA.

<sup>†</sup>These authors contributed equally to the study.

\*Correspondence and requests for materials should be addressed to Ying H. Shen, One Baylor Plaza, BCM 390, Houston, Texas 77030, USA. Phone 832-355-9952; fax 832-355-9951; e-mail [hyshen@bcm.edu](mailto:hyshen@bcm.edu); and Scott LeMaire, MD, One Baylor Plaza, BCM 390, Houston, Texas 77030, USA. Phone 832-355-9942; fax 832-355-9948; e-mail [slemaire@bcm.edu](mailto:slemaire@bcm.edu).

**Figure S1**

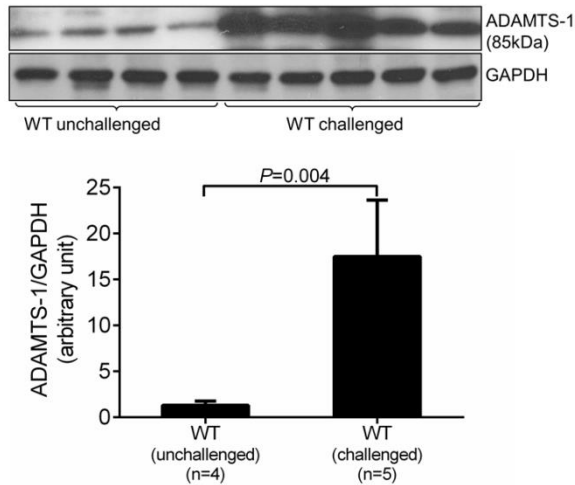

**Figure S1.** Representative western blot images of aortas from unchallenged WT mice (n=4) and challenged WT mice (n=5). Quantification studies showing the increased expression of ADAMTS-1 in the aortas of challenged WT mice versus unchallenged WT mice.

**Figure S2**

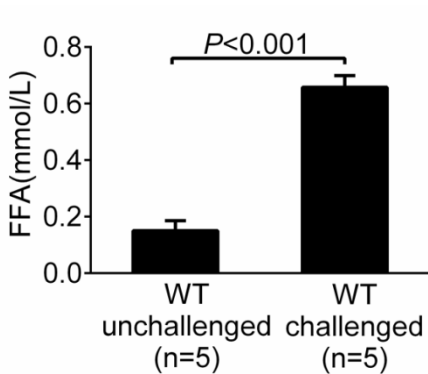

**Figure S2.** Free fatty acid levels in serum were significantly higher in challenged WT mice than in unchallenged WT mice.
